# Supplementary material
Source: HighWire-hosted journal article supplement (https://www.jneurosci.org/highwire/filestream/598895/field_highwire_adjunct_files/0/JN-RM-2457-07_supplemental_R3.pdf)
Supplement: JN-RM-2457-07_supplemental_R3.pdf [file JN-RM-2457-07_supplemental_R3.pdf]

## SUPPLEMENTAL INFORMATION

### A ROLE OF THE TRP DOMAIN OF VANILLOID RECEPTOR I IN CHANNEL GATING

<sup>1,§</sup>Nuria García-Sanz, <sup>1,§</sup>Pierluigi Valente, <sup>2</sup>Ana Gomis, <sup>1</sup>Asia Fernández-Carvajal,  
<sup>1</sup>Gregorio Fernández-Ballester, <sup>2</sup>Felix Viana, <sup>2</sup>Carlos Belmonte and <sup>1,\*</sup>Antonio Ferrer-  
Montiel

<sup>1</sup>Instituto de Biología Molecular y Celular, Universidad Miguel Hernández, Alicante,  
Spain; <sup>2</sup>Instituto de Neurociencias de Alicante, Universidad Miguel Hernández-CSIC,  
Alicante, Spain. <sup>§</sup>These authors have contributed equally to this work.

#### Methods

**Intracellular Ca<sup>2+</sup> imaging.** Transfected cells (10<sup>6</sup> cells/cm<sup>2</sup>) were incubated with 5 μM fura-2 AM dissolved in standard extracellular solution and 0.02% pluronic (both from Invitrogen) for 40 min at 37°C in darkness in isotonic 0 Ca<sup>2+</sup> solution (in mM: 140 NaCl, 4 KCl, 4 MgCl<sub>2</sub>, 5 glucose, 10 HEPES pH 7.4). For Ca<sup>2+</sup> imaging, cells were continuously perfused (1 ml/min) with isotonic standard solution at 20-22°C. Fluorescence measurements were made with a Leica (Nussloch, Germany) DM IRE2 inverted microscope fitted with a 12-bit cooled CCD camera (Imago QE Sensicam; T.I.L.L. Photonics, Graefelfing, Germany). Fura-2 was excited at 340 and 380 nm with a Polychrome IV monochromator (T.I.L.L. Photonics), and the emitted fluorescence was filtered with a 510 nm long-pass filter. Calibrated ratios (0.5 Hz) were displayed on-line with T.I.L.L. Vision software version 4.01 (T.I.L.L. Photonics).

**Electrophysiology measurements in *Xenopus* oocytes.** Capped cRNA was synthesized using the mMESSAGE mMACHINE™ from AMBION. cRNA (5 ng for each species) was microinjected (V=50 nl) into defolliculated oocytes (Stage V and VI) as described ([Ferrer-Montiel and Montal, 1999](#)). Oocytes were functionally assayed 48-72h after cRNA injection. Whole-cell currents from oocytes were recorded with a two-microelectrode voltage-clamp amplifier ([Garcia-Martinez et al., 2000](#); [Garcia-Sanz et al., 2004](#)). Oocytes were continuously perfused (2 ml min<sup>-1</sup>) with Mg<sup>2+</sup>-Ringer's solution (in mM: 10 HEPES pH 7.4, 115 NaCl, 2.8 KCl, 0.1 BaCl<sub>2</sub>, 2.0 MgCl<sub>2</sub>) at 20°C. TRPV1 currents were activated with acidic solution (Mg<sup>2+</sup>-Ringer's solution with 10 mM MES, pH 6.0) or 10 μM capsaicin. The holding potential was kept at -60 mV unless otherwise indicated. Data acquisition and processing was carried out in a NPI TEC10 two microelectrode voltage clamp amplifier (NPI Electronic) with the Pulse/PulseFit 8.5v software package (HEKA Elektronik).

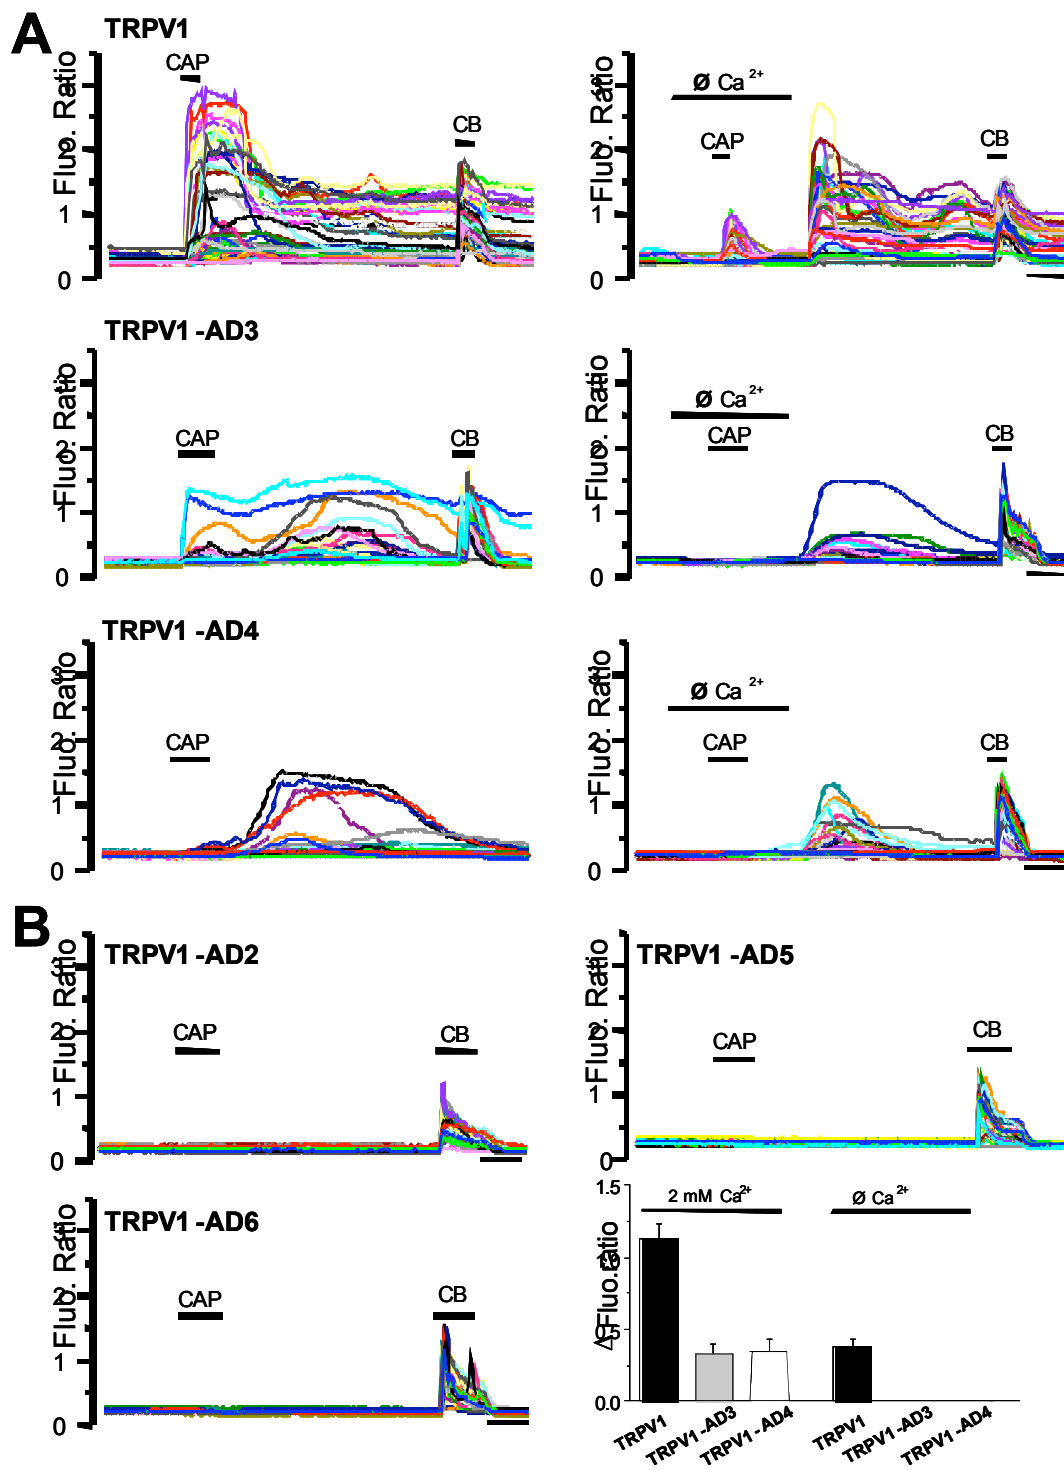

Figure 1S

**Figure S1.** Ratiometric  $\text{Ca}^{2+}$  responses (fura-2) to 100  $\mu\text{M}$  capsaicin (CAP) of the different constructs transfected into HEK293 cells. Following capsaicin application, the field was probed with 100  $\mu\text{M}$  carbachol (CB) to evoke  $\text{Ca}^{2+}$  release from internal stores. Each graph presents 50 randomly chosen cells. Wild type TRPV1 was the only construct producing a  $\text{Ca}^{2+}$  elevation with capsaicin in the absence of external calcium (with 1 mM EGTA). The delayed response (i.e. after  $\text{Ca}^{2+}$  addition) observed in TRPV1-AD3 and TRPV1-AD4 is due to residual and or bound capsaicin remaining in the cells despite extensive wash. The graph at the bottom right summarizes the  $\text{Ca}^{2+}$  elevation in a representative experiment ( $n = 25$  to  $60$ ) for the different conditions. Only cells with a response  $>0.05$  have been included in the average calculation. The calibration bar applies to all records and equals 2 min.

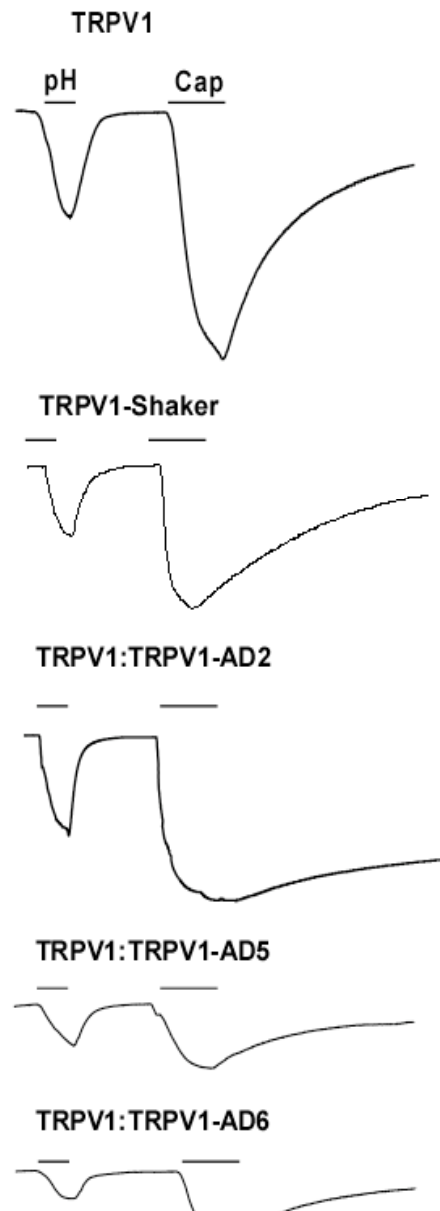

**Figure S2.** pH and vanilloid responses from oocytes co-injected with TRPV1, TRPV1:Shaker, TRPV1:TRPV1-AD2, TRPV1:TRPV1-AD5 and TRPV1:TRPV1-AD6 at a ratio of 1:1 (w:w). The holding potential was -60 mV. Currents were activated with pH 6.0 or 10  $\mu$ M Capsaicin. Traces are representative of at least 5 oocytes.

## Reference List

Ferrer-Montiel AV, Montal M (1999) Engineering the NMDA receptor channel lining. *Methods Mol Biol* 128:167-178.

Garcia-Martinez C, Morenilla-Palao C, Planells-Cases R, Merino JM, Ferrer-Montiel A (2000) Identification of an aspartic residue in the P-loop of the vanilloid receptor that modulates pore properties. *J Biol Chem* 275:32552-32558.

Garcia-Sanz N, Fernandez-Carvajal A, Morenilla-Palao C, Planells-Cases R, Fajardo-Sanchez E, Fernandez-Ballester G, Ferrer-Montiel A (2004) Identification of a tetramerization domain in the C terminus of the vanilloid receptor. *J Neurosci* 24:5307-5314.
